# Supplementary material for: Tumor bud-derived CCL5 recruits fibroblasts and promotes colorectal cancer progression via CCR5-SLC25A24 signaling
Source: PubMed Central journal article supplement (PMC8892738; doi:10.1186/s13046-022-02300-w), 2022-03-03

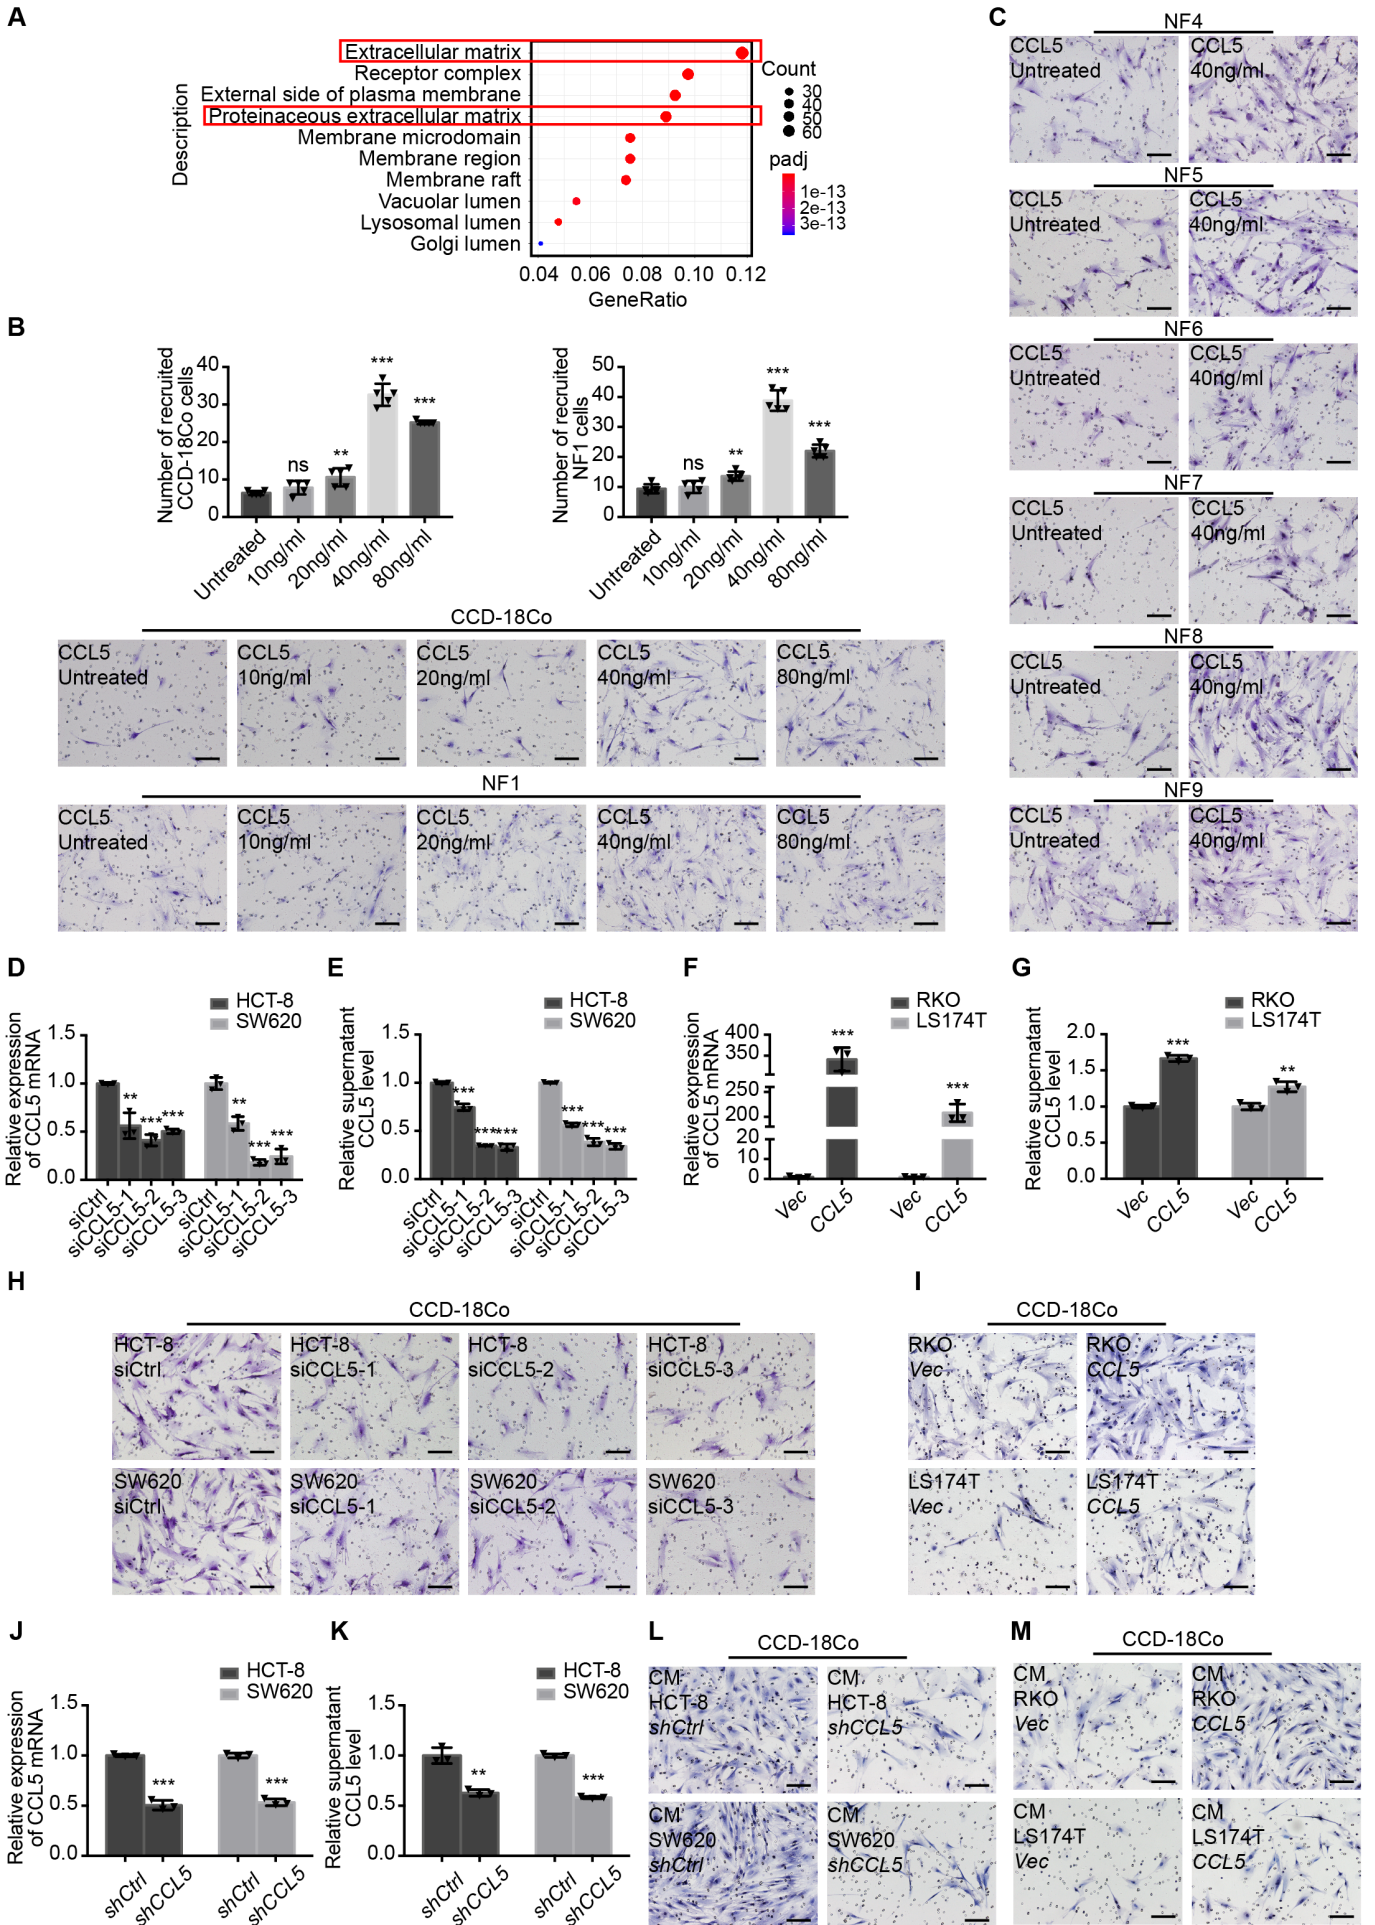

Supplement: 13046_2022_2300_MOESM2_ESM.pdf [file 13046_2022_2300_MOESM2_ESM.pdf]
