# Supplementary material for: Tumor bud-derived CCL5 recruits fibroblasts and promotes colorectal cancer progression via CCR5-SLC25A24 signaling
Source: Springer Nature journal article supplement (doi:10.1186/s13046-022-02300-w), 2022-03-03

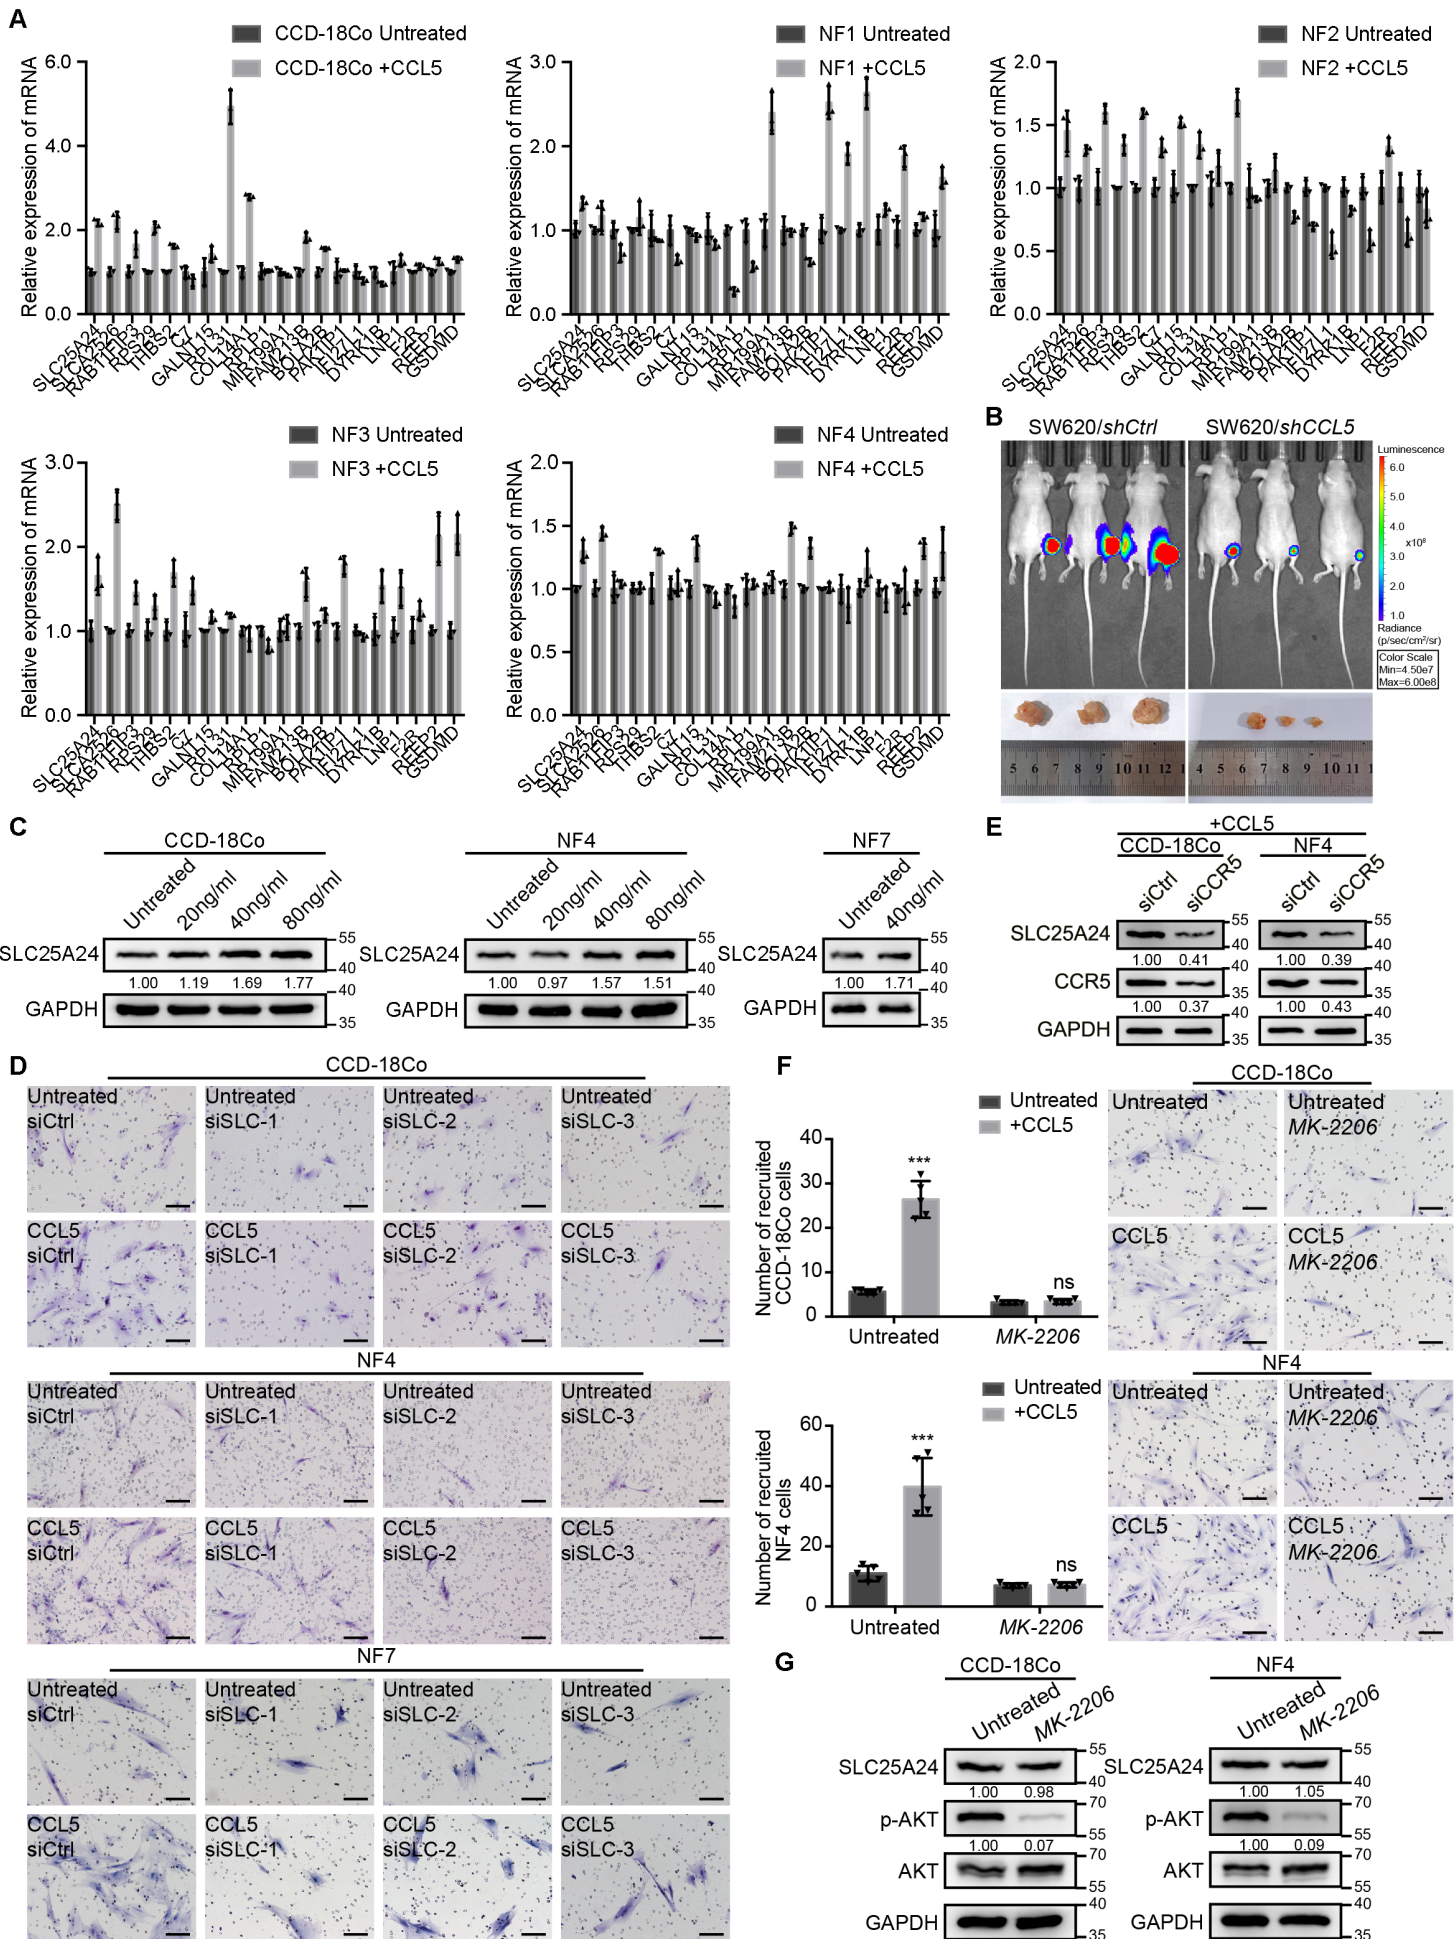

Supplement: MOESM3 [file 20189492]
